# Supplementary material for: Microbial Production of Bioactive Retinoic Acid Using Metabolically Engineered Escherichia coli
Source: MDPI journal article supplement (doi:10.3390/microorganisms9071520), 2021-07-16
Supplement: s1 [file s1]

**TableS1. Primers used in this study.**

| Name                                                          | Sequences (5'→3')                                             |
|---------------------------------------------------------------|---------------------------------------------------------------|
| <b>Primers for retinoid biosynthesis pathway construction</b> |                                                               |
| <i>blh<sub>SR</sub></i> -F-XbaI                               | GCTCTAGAAGGAGGATTACAAAATGCACAACCCGGTTACCC                     |
| <i>blh<sub>SR</sub></i> -R-EcoRI                              | GGAATTCTCAGGAGACGGCCTGGG                                      |
| <i>ALDH1A2</i> -F-XbaI                                        | GCTCTAGAATGACTTCCAGCAAGATAGAGAT                               |
| <i>ALDH1A2</i> -R-EcoRI                                       | GGAATTCTTAGGAGTTCTTCTGGGGGAT                                  |
| pUCM-F                                                        | TCTAGAGCGCCCGGGGA                                             |
| mRS12-pUCM-R                                                  | <u>GTTTAAACTGACTGACGCACCAAAAGCGCTCACAATTCCACACAACA</u>        |
| mRS37-pUCM-R                                                  | <u>GTTTAAACAATAAATTACGAGCCAGTCGCTCACAATTCCACACAACA</u>        |
| mRS46-pUCM-R                                                  | <u>GTTTAAACCGAATTGGTGGGGCGAGACGCTCACAATTCCACACAACA</u>        |
| mRS-H-pUCM-F-BamHI                                            | CGCGGATCCTTTTTGTAGTAAAGGAGCATCGCTAAGGAGGATTACAAATCTAGA<br>ATG |
| mRS-M-pUCM-F BamHI                                            | CGCGGATCCTTTTTGTAGTAAAGAAGCAGGAGGATTACAAATCTAGAATG            |
| mRS-R-BamHI                                                   | CGCGGATCCCGCTCACAATTCCACACAAC                                 |
| pET- <i>blh<sub>SR</sub></i> -F-XbaI                          | GCTCTAGAATGCACAACCCGGTTACCC                                   |
| pET- <i>blh<sub>SR</sub></i> -R-HindIII                       | CCCAAGCTTGGAGACGGCCTGGGGG                                     |
| pET- <i>ALDH1A2</i> -F-BamHI                                  | CGCGGATCCATGACTTCCAGCAAGATAGAGAT                              |
| pET- <i>ALDH1A2</i> -R-EcoRI                                  | CGGAATTCCGGAGTTCTTCTGGGGGATC                                  |
| pSTVM2-sub-USER-3-F                                           | AGACAGUCATAAGTGCGG                                            |
| pSTVM2-sub-USER-1-R                                           | ATGCAACUCGTAGGACAG                                            |
| pUC- sub-USER-3-F                                             | AGACAGUCAATCTGCTCTGATGCC                                      |
| pUC- sub-USER-1-R                                             | ATGCAACUCATAATGAATCGGCCAAC                                    |
| pUC-sub-USER-1-F                                              | AGTTGCAUCCCGACTGGAAAGCG                                       |
| pUC-sub-USER-2-F                                              | ATCCATGUCCCGACTGGAAAGCG                                       |
| pUC-sub-USER-5-F                                              | ATATGCGAUCCCGACTGGAAAGCG                                      |
| pUC-sub-USER-2-R                                              | ACATGGAUATGCGGTGTGAAATACC                                     |
| pUC-sub-USER-5-R                                              | ATCGCATAUATGCGGTGTGAAATACCG                                   |
| pUC-sub-USER-3-R                                              | ACTGTCUATGCGGTGTGAAATACCG                                     |
| Gibson-pSTVM2-F                                               | AGACAGTCATAAGTGCGGC                                           |
| Gibson- <i>blh<sub>SR</sub></i> -F                            | CCCCCAGAAGAACTCCTAATTCCTCCGACTGGAAAGCG                        |
| Gibson- <i>blh<sub>SR</sub></i> -R                            | GCCGCACTTATGACTGTCTTATGCGGTGTGAAATACCG                        |
| Gibson- <i>ALDH1A2</i> -R                                     | TTAGGAGTTCTTCTGGGGG                                           |

### Primers for genome editing

|                                  |                                                                              |
|----------------------------------|------------------------------------------------------------------------------|
| <i>ybbO</i> -FRT-KO-F            | GTTTATTGCCGACTGGATGGCGAAGCAGTTGCAGCCTTTAGTAAATCATGAAATT<br>AACCCTCACTAAAGGGC |
| <i>ybbO</i> -FRT-KO-R            | GACATGGGGGCTTAAGCGCGCGCTTCAACTCACCCCTGCAATATTTTGTACGAC<br>TCACTATAGGGCTC     |
| <i>ybbO</i> -Confirm-F           | TCTGCTGAAACAGCATCAG                                                          |
| <i>ybbO</i> -Confirm-R           | GTTCTGATTGACAACTGC                                                           |
| malT-UP-F                        | AGTCGCTTAAGGCCCTGC                                                           |
| malT-UP-R                        | TCTTCCAGTGCCAGTTTTGC                                                         |
| malT-Down-F                      | AGCAAACCGAACAGATGGCA                                                         |
| malT-Down-R                      | AAGACTTCAATCCCGCTACG                                                         |
| malT- <i>blh<sub>SR</sub></i> -F | GCAAAACTGGCACTGGAAGAAGGTTTCCCGACTGGAAAG                                      |
| malT- <i>blh<sub>SR</sub></i> -R | TGCCATCTGTTTCGGTTTGCTACTATCGTCGCCGCACTTAT                                    |
| malT- <i>ALDH1A2</i> -F          | GCAAAACTGGCACTGGAAGACCCTGTCCTACGAGTTGCAT                                     |
| malT- <i>ALDH1A2</i> -R          | TGCCATCTGTTTCGGTTTGCTTTAGGAGTTCTTCTGGGGGAT                                   |

### Quantitative analysis of gene transcription levels

|                               |                      |
|-------------------------------|----------------------|
| <i>blh<sub>SR</sub></i> -RT-F | ATGTCGATGGCCCAGTTC   |
| <i>blh<sub>SR</sub></i> -RT-R | GGGTCATGATGGCGATCA   |
| <i>ALDH1A2</i> -RT-F          | TATGTGGATTTGCAGGGCGT |
| <i>ALDH1A2</i> -RT-R          | ATTGCCACAGCACAAAGCTG |

---

\*Bold letters indicate restriction enzyme sites.

\*Underline indicates 5'UTR sequence.
